# Supplementary material for: Assessing the Mediterranean diet adherence during pregnancy: practical considerations based on the associations with cardiometabolic risk
Source: medRxiv preprint, doi:10.1101/2022.09.20.22280165, version 1 (2022-09-20)
Supplement: Suppementary Material [file 280165_file02.docx]

**Supplementary Material**

**Table of contents**

**Supplementary Table S1.** Inclusion and exclusion criteria in the GESTAFIT project.

**Supplementary Figure S1.** Flow diagram of the study participants.

**Supplementary Table S2**. Components included in the Mediterranean diet adherence indices.

**Supplementary Table S3.** Association of Mediterranean diet indices with individual cardiometabolic markers during pregnancy (n=119).

**Supplementary Figure S2**. Percentage of agreement between the recommended Mediterranean dietary indices using the ROC-derived thresholds.

**Supplementary Table S1.** Inclusion and exclusion criteria in the GESTAFIT project.

| **Inclusion criteria** |
| --- |
| - Pregnant women aged 25-40 years old with a normal pregnancy course. |
| - Answering “no” to all questions on the PARmed-X for pregnancy.  - Being able to walk without assistance.  - Being able to read and write properly.  - Informed consent: Being capable and willing to provide written consent. |
| **Exclusion criteria** |
| - Having acute or terminal illness.  - Having malnutrition.  - Being unable to conduct tests for assessing physical fitness or exercise during pregnancy.  - Having pregnancy risk factors (such as hypertension, type 2 diabetes, etc.).  - Having a multiple pregnancy.  - Having chromosopathy or foetal malformations.  - Having uterine growth restriction.  - Having foetal death.  - Having upper or lower extremity fracture in the past 3 months.  - Suffering neuromuscular disease or presence of drugs affecting neuromuscular function.  - Being registered in another exercise program.  - Performing more than 300 minutes of at least moderate physical activity per week.  -Being engaged in another physical exercise program  - Being unwilling either to complete the study requirements or to be randomized into the control or intervention group. |

Assessed for eligibility (n=384)

Excluded for different causes(n=162):

-Did not answer the phone (n=52)

-Declined to participate (n=110)

Called for first evaluation (n=222)

Excluded on exclusion criteria (n=5):

-Multiple pregnancy (n=1)

-Engaged moderate physical activity [>300 min per week] (n=2)

-Was over 16±2 weeks of gestations at the time of the first evaluation (n=1)

-Pregnancy risk factor [vaginal bleeding] (n=1)

Excluded for another cause (n=58):

-Declined to participate (n=58)

Analysed (n=159)

Analysed for sociodemographic data (**n=152**)

-Excluded from analysis (missing initial data and/or missing data in the food frequency questionnaire) (n=7)

Analysed for cardiometabolic risk data at the 16th gestational week (**n=119**)

-Excluded from analysis (missing data in biochemical markers, blood pressure and/or body composition) (n=33)

Analysed for cardiometabolic risk data at the 34th gestational week (**n=107**)

-Excluded from analysis (missing data in biochemical markers, blood pressure and/or body composition) (n=45)

**Final study sample (n=152)**

**Supplementary Figure S1.** Flow diagramof the study participants**.**

**Supplementary Table S2.** Components included in the Mediterranean diet adherence indices.

|  | **Food groups included in the Mediterranean diet adherence indices** | | | | |
| --- | --- | --- | --- | --- | --- |
| **Category** | **MFP** | **MDScale** | **SMDQ** | **MedDietScore** | **MDS-P** |
| **Cereals** | Cereals (g/day) | Cereals (g/day) | White bread (s/day) | Whole-grain cereals (s/month) | Cereals (g/day) |
| High glycemic foods (g/day) |  | White rice (s/week) |  |  |
|  |  | Whole grain-bread (s/week) |  |  |
| **Dairy products** |  | High fat dairy (g/day) |  | Whole dairy products (s/month) | High fat dairy (g/day) |
| **Fat** | Olive oil (g/day) | Monosaturated/  saturated lipid ratio | Olive oil (s/day) | Olive oil (s/week) | Monosaturated/  saturated lipid ratio |
| **Fiber** | Fiber (g/day) |  |  |  |  |
| **Fish** | Fish (g/day) | Fish (g/day) | Fish (s/week) | Fish (s/month) | Fish (g/day) |
| **Fruits, vegetables and nuts** | Fruits (g/day) | Fruits and nuts (g/day) | Fruits (s/day) | Fruits (s/month) | Fruits and nuts (g/day) |
| Vegetables (g/day) | Vegetables (g/day) | Fruits and vegetables (s/day) | Vegetables (s/month) | Vegetables (g/day) |
|  |  | Vegetables (s/day) |  |  |
| **Legumes** |  | Legumes (g/day) | Legumes (s/week) | Legumes (s/month) |  |
| **Meat** | Meat and subproducts (g/day) | Meat and  subproducts (g/day) | Meat (s/day) | Poultry (s/month) | Meat and subproducts (g/day) |
|  |  |  | Red meat and subproducts (s/month) |  |
| **Micronutrients** |  |  |  |  | Calcium (mg/day) |
|  |  |  |  | Folic acid (μg/day) |
|  |  |  |  | Iron (mg/day) |
| **Potatoes** |  |  |  | Potatoes (s/month) |  |

MDScale, Mediterranean Diet Scale; MedDietScore, Mediterranean Diet Score; MDS-P, Mediterranean diet scale for pregnant women; MFP, Mediterranean Food Pattern; S, servings; SMDQ, Short Mediterranean Diet questionnaire.

**Supplementary Table S3**. Association of Mediterranean diet indices with individual cardiometabolic markers during pregnancy.

| **Dietary Index** | **Pre-pregnancy BMI** | | **SBP** | | **DBP** | | **Glucose** | | **Triglycerides** | | **HDL-C** | |
| --- | --- | --- | --- | --- | --- | --- | --- | --- | --- | --- | --- | --- |
| **Cardiometabolic risk markers at the 16th gestational week (n=119)a** | | | | | | | | | | | | |
|  | **Β** | ***p*** | **β** | ***p*** | **β** | ***p*** | **β** | ***p*** | **β** | ***p*** | **β** | ***p*** |
| MFP (4-35) | -0.194 | **0.039** | -0.213 | **0.029** | -0.109 | 0.264 | -0.079 | 0.413 | -0.102 | 0.289 | 0.188 | **0.040** |
| MDScale (0-8) | -0.020 | 0.830 | -0.142 | 0.135 | -0.013 | 0.890 | 0.001 | 0.995 | 0.022 | 0.817 | 0.160 | 0.069 |
| SMDQ (0-8) | -0.134 | 0.144 | -0.210 | **0.027** | -0.154 | 0.105 | 0.000 | 1.000 | -0.060 | 0.520 | 0.196 | **0.027** |
| MedDietScore (0-50) | -0.168 | 0.061 | -0.224 | **0.016** | -0.160 | 0.084 | -0.009 | 0.920 | -0.129 | 0.159 | 0.263 | **0.002** |
| MDS-P (0-11) | -0.124 | 0.180 | 0.208 | **0.029** | -0.094 | 0.326 | -0.005 | 0.956 | -0.011 | 0.905 | 0.100 | 0.266 |
| **Cardiometabolic risk markers at the 34th gestational week (n=107)b** | | | | | | | | | | | | |
|  | **βc** | ***pc*** | **β** | ***p*** | **β** | ***p*** | **β** | ***p*** | **β** | ***p*** | **β** | ***p*** |
| MFP (4-35) | - | - | -0.215 | **0.033** | -0.167 | 0.106 | -0.210 | **0.033** | -0.124 | 0.227 | 0.254 | **0.010** |
| MDScale (0-8) | - | - | -0.201 | **0.039** | -0.092 | 0.360 | -0.177 | 0.064 | -0.037 | 0.707 | 0.160 | **0.028** |
| SMDQ (0-8) | - | - | -0.132 | 0.190 | -0.137 | 0.181 | -0.001 | 0.989 | -0.101 | 0.320 | 0.158 | 0.106 |
| MedDietScore (0-50) | - | - | -0.243 | **0.012** | -0.194 | **0.050** | -0.154 | 0.105 | -0.183 | 0.062 | 0.348 | **<0.001** |
| MDS-P (0-11) | - | - | -0.309 | **0.002** | -0.230 | **0.024** | -0.254 | **0.009** | -0.136 | 0.178 | 0.146 | 0.137 |

MDScale, Mediterranean Diet Scale; MedDietScore, Mediterranean Diet Score; MDS-P, Mediterranean diet scale for pregnant women; MFP, Mediterranean Food Pattern; SMDQ, Short Mediterranean Diet questionnaire. aModel adjusted for age, smoking habit and number of children. bModel additionally adjusted for exercise intervention Higher clustered cardiometabolic status entails higher cardiometabolic risk. Bold values indicate a *p*<0.05. *Since pre-pregnancy BMI is not affected by the intervention the model was not adjusted.

cPre-pregnancy BMI is not shown for gestational week 34th since it was measured prior to pregnancy period.

**Supplementary Figure S2.** Percentage of agreement between the recommended Mediterranean diet indices using the ROC-derived thresholds (n=152). Kappa coefficients are classified as < 0, no agreement; 0-0.19, poor agreement; 0.20-0.39, fair agreement; 0.40-0.59, moderate agreement; 0.60-0.79, substantial agreement; 0.80-0.99, almost perfect agreement; 1, perfect agreement. MDScale, Mediterranean Diet Scale; MedDietScore, Mediterranean Diet Score; MDS-P, Mediterranean diet scale for pregnant women; MFP, Mediterranean Food Pattern; SMDQ, Short Mediterranean Diet questionnaire.
